# Supplementary material for: Primary Tumor Hypoxia Recruits CD11b+/Ly6Cmed/Ly6G+ Immune Suppressor Cells and Compromises NK Cell Cytotoxicity in the Premetastatic Niche
Source: Oxford University Press journal article supplement (doi:10.1158/0008-5472.can-11-3873), 2012-07-03
Supplement: 00085472can113873-sup-f2_221k.pdf [file 00085472can113873-sup-f2_221k.pdf]

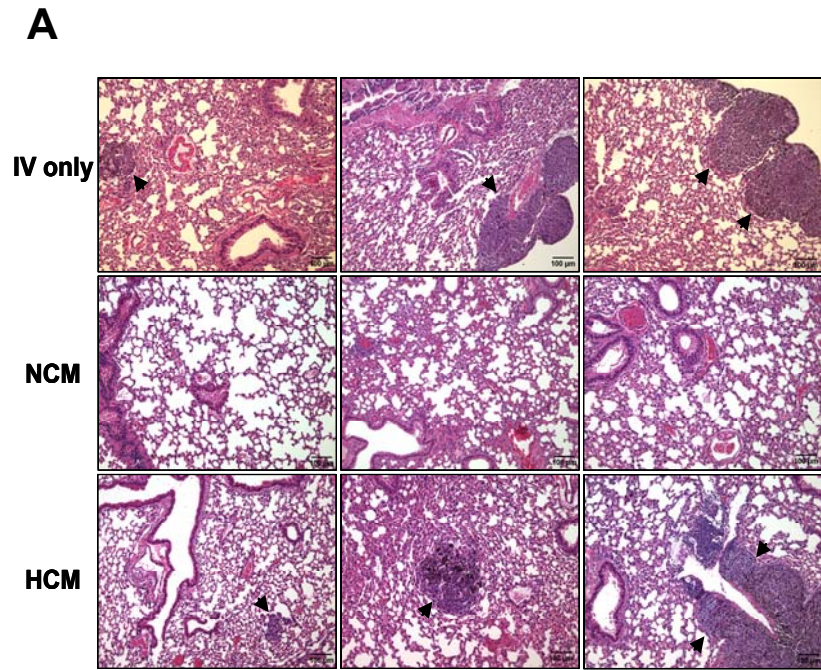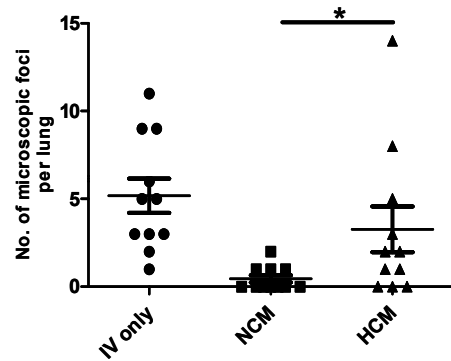

**B**

| PyMT-WT                     |                       | EO771                          |                       |
|-----------------------------|-----------------------|--------------------------------|-----------------------|
| Target (Ref)                | Up/Down under hypoxia | Target (Ref)                   | Up/Down under hypoxia |
| IFN- $\gamma$ (B15)         | Down                  | Amphiregulin (M4)              | Down                  |
| M-CSF (J4)                  | Down                  | IL-10 (P2)                     | Down                  |
| HB-EGF (O5)                 | Down                  | IL-4 (I2)                      | Down                  |
| Leptin (P5)                 | Down                  | CXCL10 (J1)                    | Down                  |
| PTX3/TSG-14 (Q6)            | Down                  | M-CSF (J4)                     | Down                  |
| ADAMTS1 (S3)                | Up                    | CXCL2/MIP2 (J10)               | Down                  |
| Angiopoietin-3 (S7)         | Up                    | IL-1 $\beta$ (H10)             | Up                    |
| Coagulation Factor III (S8) | Up                    | IL-1ra (H11)                   | Up                    |
| CXCL16 (S9)                 | Up                    | Endostatin/Collagen XVIII (T7) | Up                    |
| CCN1 (T2)                   | Up                    | CXCL1 (J3)                     | Up                    |
| Endothelin-1 (T8)           | Up                    | MCP-1/CCL2 (V6)                | Up                    |
| CX3CL1 (U3)                 | Up                    | MMP-3 (pro and mature) (V8)    | Up                    |
| IGFBP-3 (U9)                | Up                    | MMP-9 (pro and active) (V10)   | Up                    |
| Serpin E1 (X3)              | Up                    | PlGF-2 (W8)                    | Up                    |
| G-CSF (H3)                  | Up                    | TSP-2 (X5)                     | Up                    |
| IL-1ra (H11)                | Up                    | TIMP-1 (X6)                    | Up                    |
| CXCL10 (J1)                 | Up                    | VEGF (X8)                      | Up                    |
| MCP-1/CCL2 (J5)             | Up                    |                                |                       |
| CCL5/RANTES (J11)           | Up                    |                                |                       |
| TNF- $\alpha$ (K3)          | Up                    |                                |                       |
