# Supplementary material for: Primary Tumor Hypoxia Recruits CD11b+/Ly6Cmed/Ly6G+ Immune Suppressor Cells and Compromises NK Cell Cytotoxicity in the Premetastatic Niche
Source: Oxford University Press journal article supplement (doi:10.1158/0008-5472.can-11-3873), 2012-07-03
Supplement: 00085472can113873-sup-fl4_72k.pdf [file 00085472can113873-sup-fl4_72k.pdf]

### **Supplementary Figure 1.**

**A)** Western blot of Hif-1 $\alpha$ /Hif-2 $\alpha$  protein expression in PyMT-WT and EO771 cell lysates after exposure to normoxic (20% O<sub>2</sub>) or hypoxic conditions (2% O<sub>2</sub>) for 2 or 10 hours. **B)** Schematic of experimental metastasis procedure. Cell-free NCM and HCM from PyMT-WT and EO771 mammary tumor cells was injected intraperitoneally into mice daily for 7 days, followed by intravenous injection of Cherry-labelled PyMT-WT or EO771 mammary or B16F10 melanoma tumor cells on day 7. Lungs were harvested at 2 or 4 weeks post tumor cell injection.

### **Supplementary Figure 2.**

**A)** Representative H&E images of micro- and macrometastases in lungs 2 weeks post injection of B16F10 tumor cells in mice pre-treated with PyMT-WT NCM or HCM. B16F10 metastases (indicated by black arrow heads) counted by dissecting microscope and summarised in graph below (n=10/group). Mean  $\pm$  SEM. **B)** Cytokines/growth factors increased or decreased in PyMT-WT and EO771 HCM. Previously published factors in pre-metastatic niche formation are highlighted in green, and references for corresponding target positions on arrays in Figure 2B & C shown in brackets.

### **Supplementary Figure 3.**

**A/B)** Flow cytometry analysis of CD11b<sup>+</sup>/Ly6C<sup>med</sup> (**A**) and CD11b<sup>+</sup>/Ly6C<sup>high</sup> (**B**) myeloid cell lung infiltrate in mice treated with PyMT-WT NCM/HCM alone (n=5-8) or NCM/HCM neutralized with MCP-1 antibody (anti-MCP-1 + NCM/HCM; n=10). Mean percentage  $\pm$  SEM.

### **Supplementary Figure 4.**

**A)** Flow cytometry analysis of eGFP<sup>+</sup> BMDC lung infiltrate for CD3<sup>+</sup>/CD4<sup>+</sup> T cells, CD3<sup>+</sup>/CD8<sup>+</sup> T cells, CD11b<sup>+</sup>/MHC Class II<sup>+</sup>/F4/80<sup>+</sup> macrophages and CD11c<sup>+</sup>/MHC Class II<sup>+</sup> dendritic cell subpopulations (n=5/group). **B)** Flow cytometry analysis of mean intensity CD69 expression on CD3<sup>-</sup>/NK1.1<sup>+</sup> cells compared to isotype control (n=5/group). **C)** Flow cytometry analysis of % CD3<sup>-</sup>/NK1.1<sup>+</sup> NK cells in peripheral blood from mice after treatment with isotype (n=9) or asialoGM1 antibody (n=18) but before NCM/HCM injection. Mean percentage  $\pm$  SEM.
