# Supplementary figures and images for: Primary Tumor Hypoxia Recruits CD11b+/Ly6Cmed/Ly6G+ Immune Suppressor Cells and Compromises NK Cell Cytotoxicity in the Premetastatic Niche
Source: Oxford University Press journal article supplement (doi:10.1158/0008-5472.can-11-3873), 2012-07-03

**A**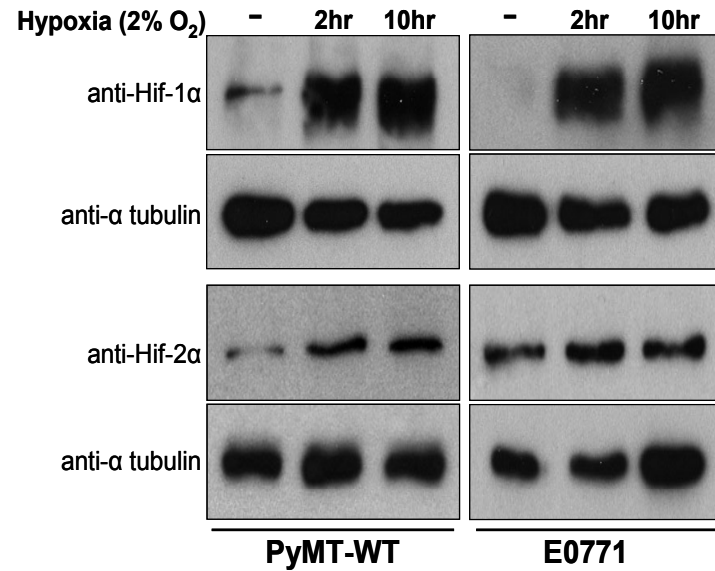**B**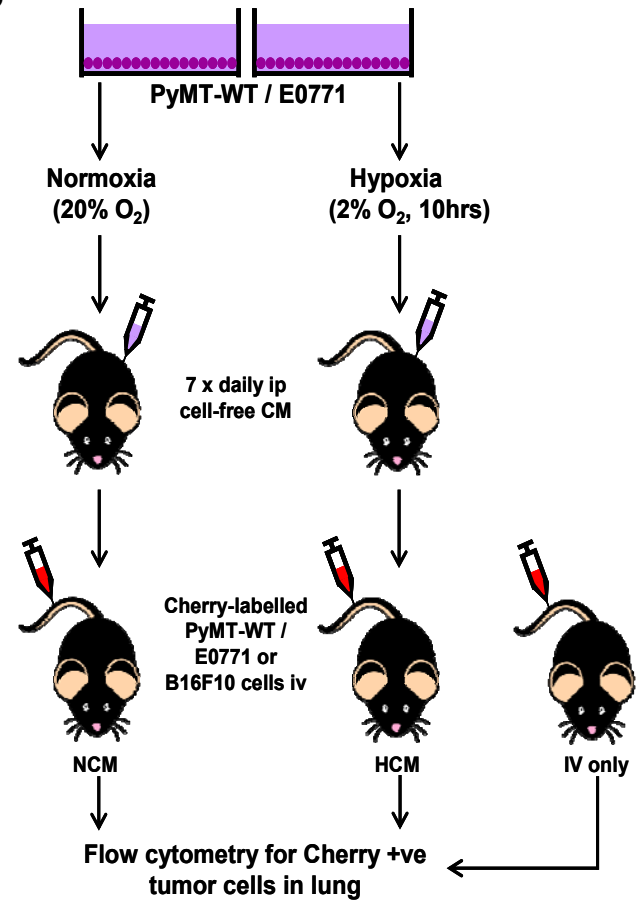

Supplement: 00085472can113873-sup-f1_296k.pdf [file 00085472can113873-sup-f1_296k.pdf]

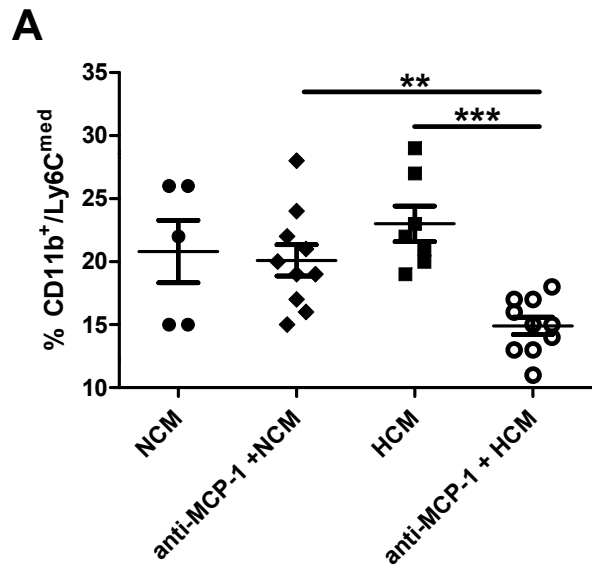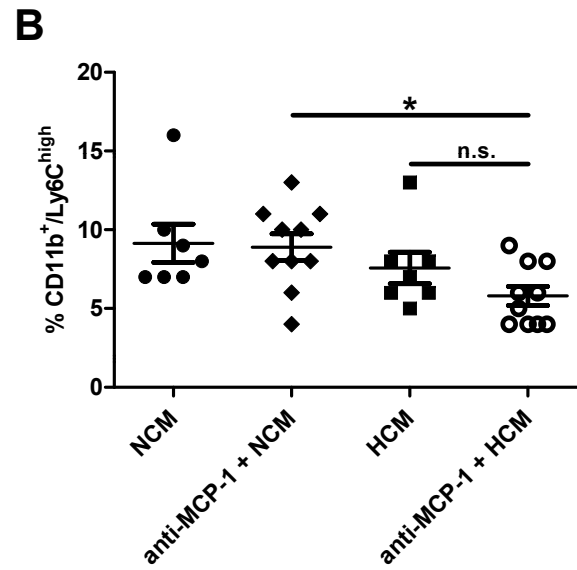

Supplement: 00085472can113873-sup-f3_33k.pdf [file 00085472can113873-sup-f3_33k.pdf]

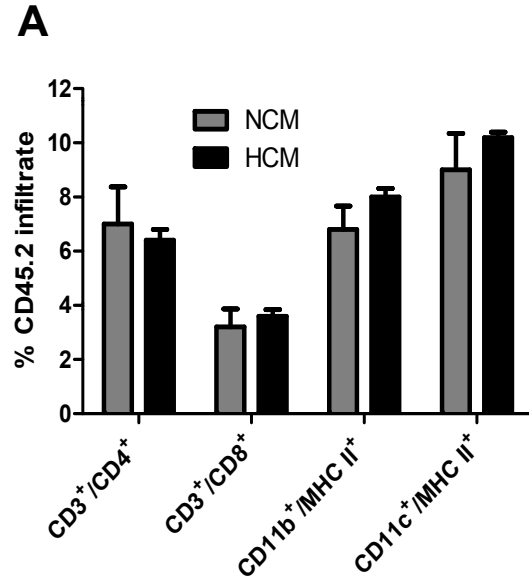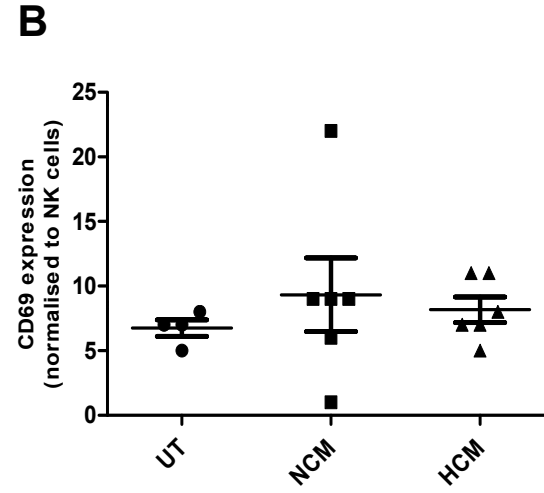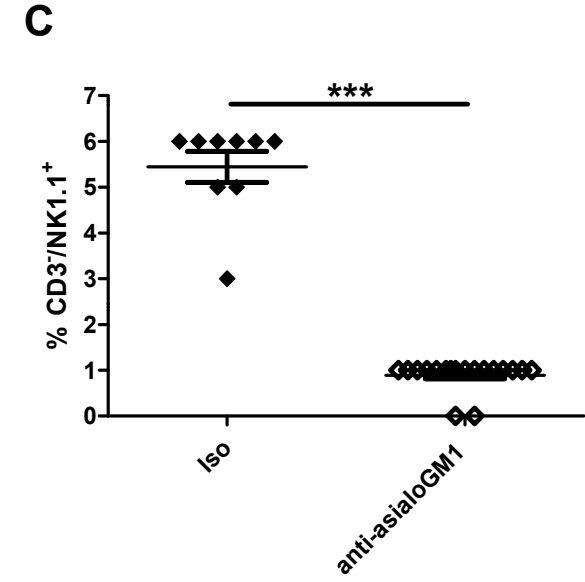

Supplement: 00085472can113873-sup-f4_49k.pdf [file 00085472can113873-sup-f4_49k.pdf]
